# Supplementary material for: 495-Year Wood Anatomical Record of Siberian Stone Pine (Pinus sibirica Du Tour) as Climatic Proxy on the Timberline
Source: MDPI journal article supplement (doi:10.3390/f13020247), 2022-02-06
Supplement: s1 [file s1]

## Supplementary materials

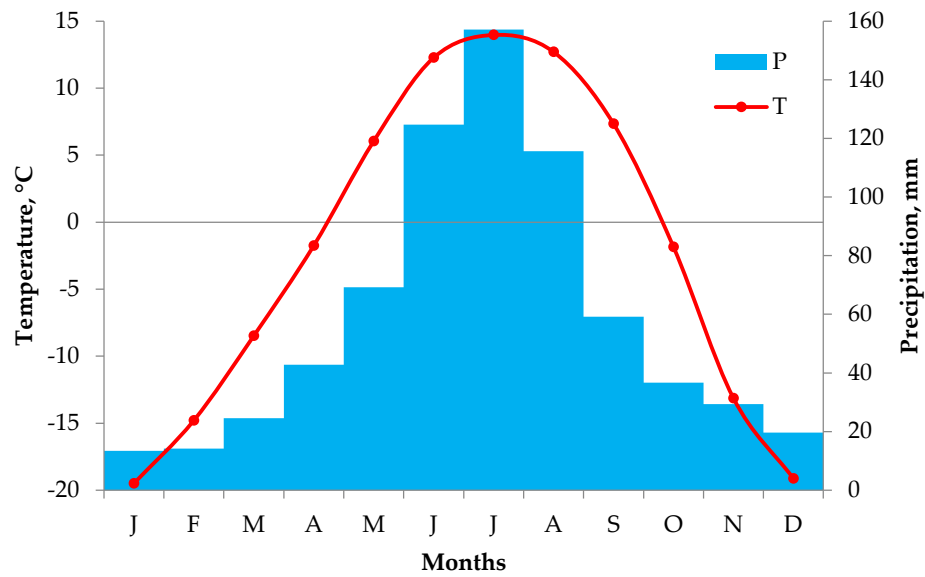

**Figure S1.** Average monthly climatic diagram of the study region (ERA-20C reanalysis over 1900-2010 for 49.7-52.5°N 89.3-90.7°E): P, precipitation; T, temperature.

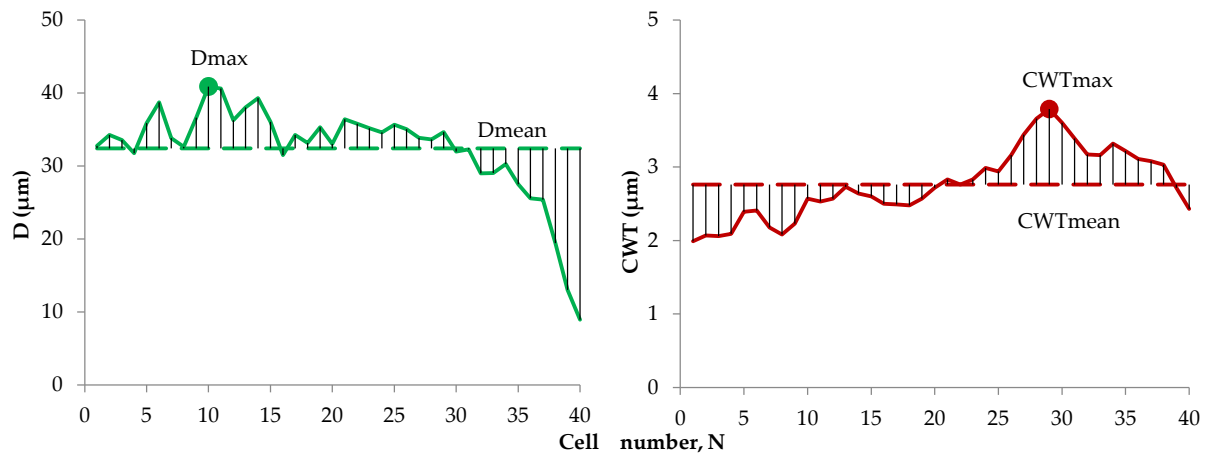

**Figure S2.** Calculation of tree-ring characteristics from tracheidograms of cell radial diameter D and cell wall thickness CWT on example of Tree\_1, ring formed in 1690.

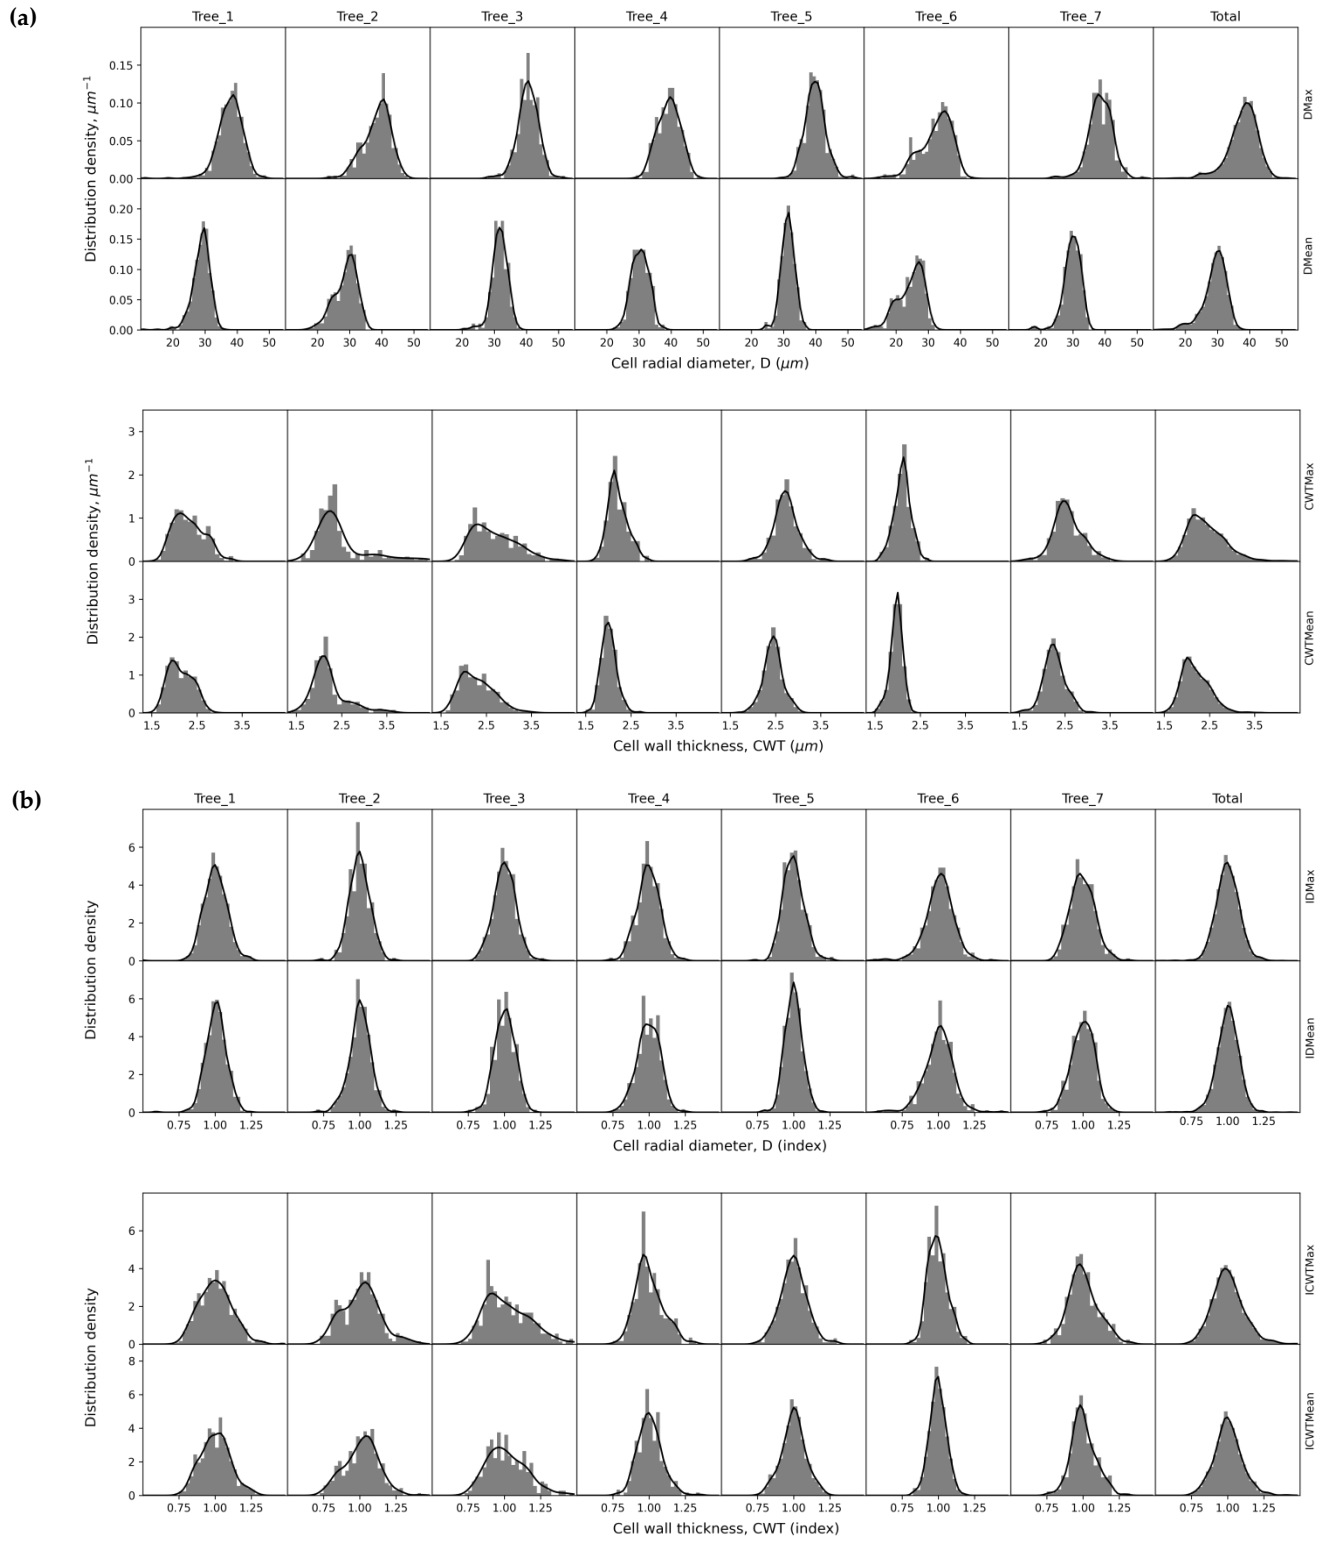

**Figure S3.** Distribution density of measured **(a)** and indexed **(b)** tree-ring anatomical characteristics for seven individual trees and total sample.

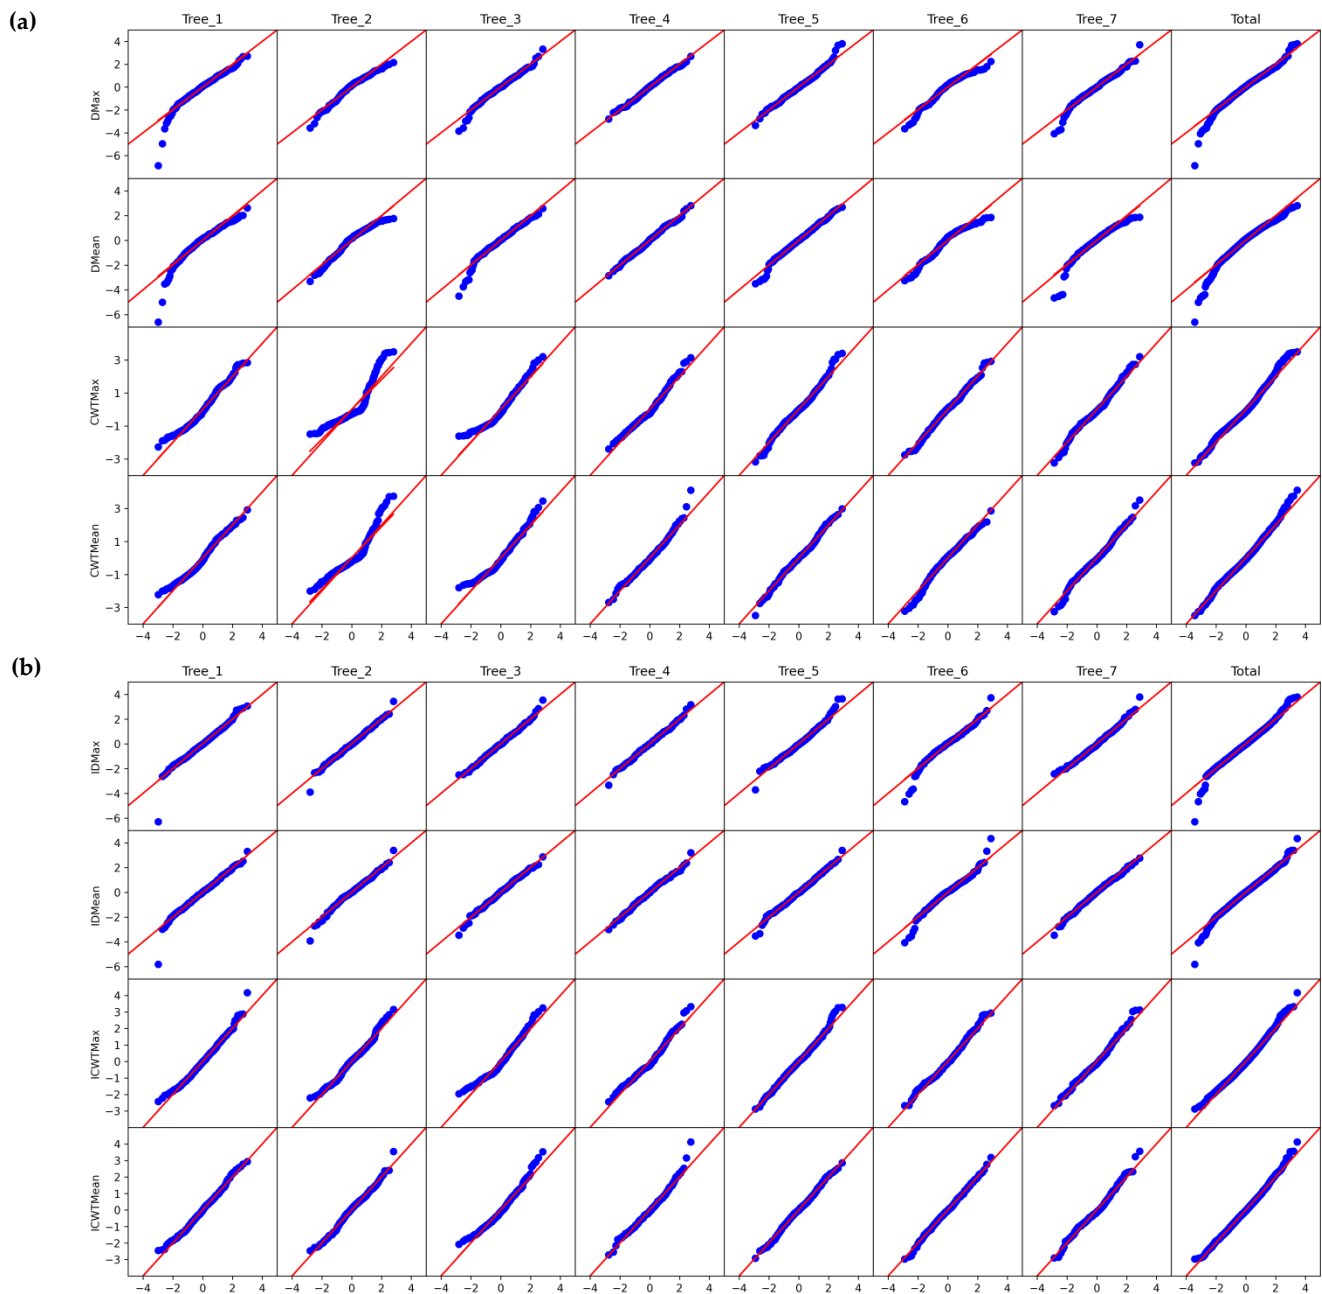

**Figure S4.** Quantile-quantile plots of measured **(a)** and indexed **(b)** tree-ring anatomical characteristics standardized to z-scores (mean 0, standard deviation 1) against standard normal distribution. Red line represents one-to-one ratio; blue dots represent actual tree rings.

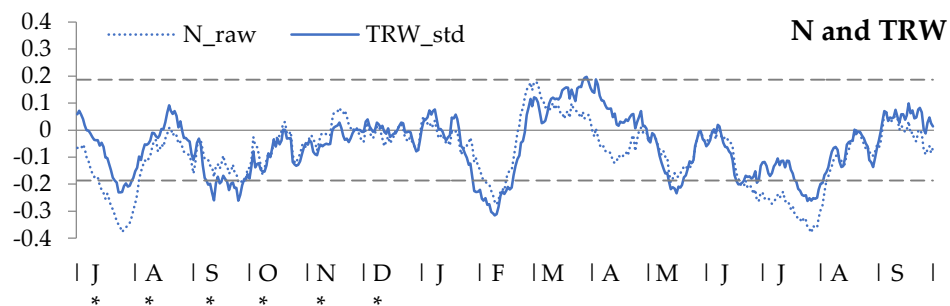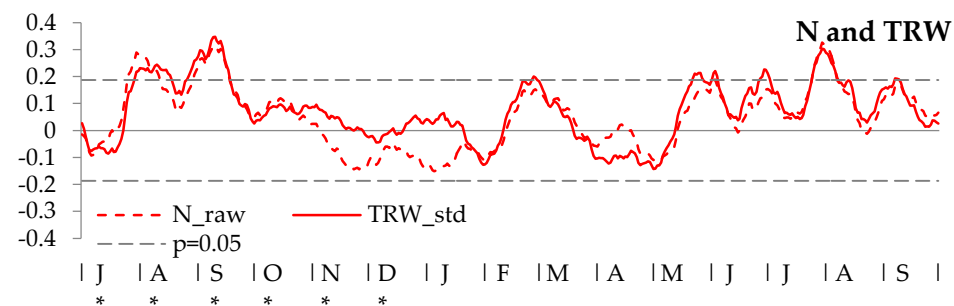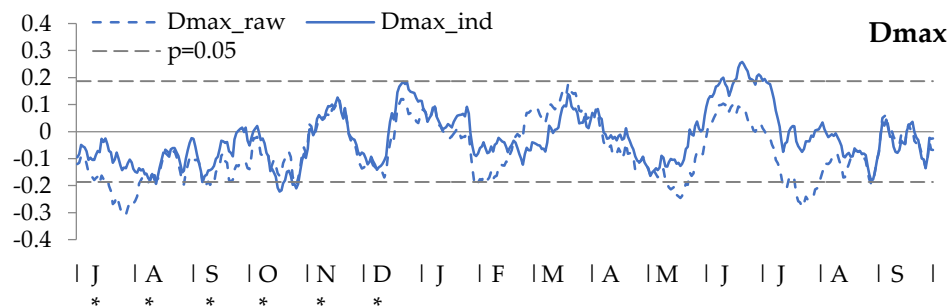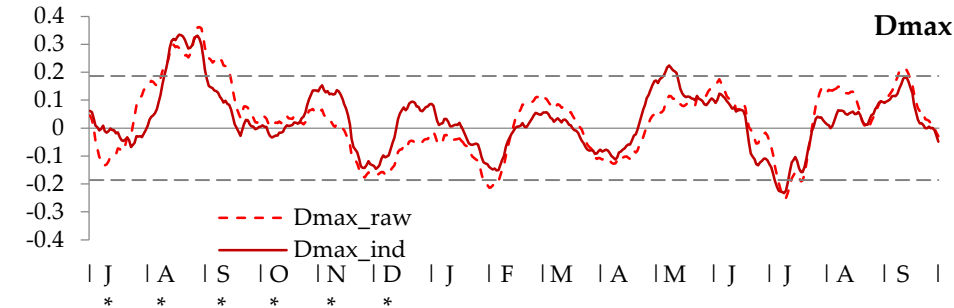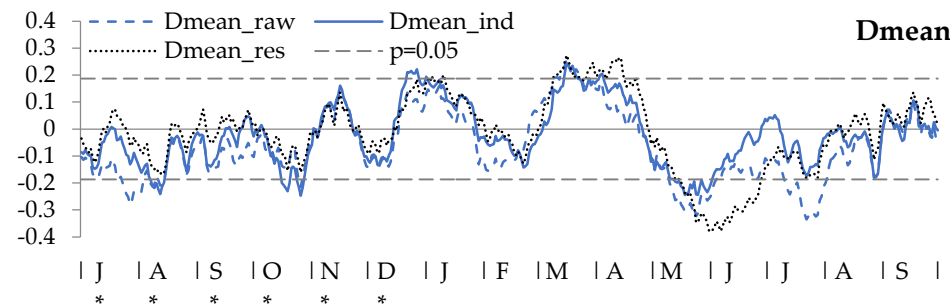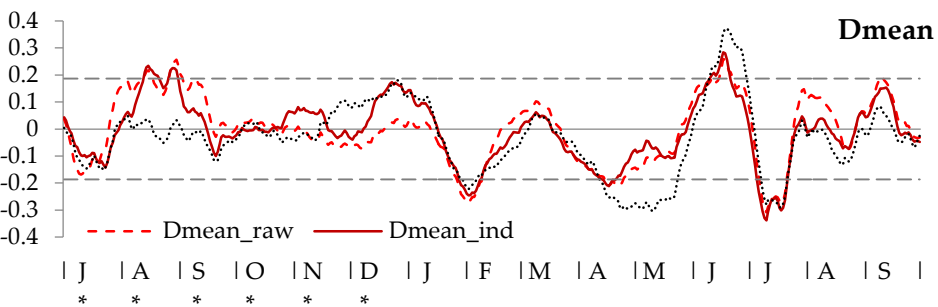

Months of previous (\*) and current year

**Figure S5.** Correlations between local chronologies of tree-ring traits and moving average series of precipitation and temperature (window 21 day, step 1 day): standard chronology of tree-ring width, TRW\_std; measured cell number, N\_raw; measured and indexed maximal radial diameter and maximal cell wall thickness: Dmax\_raw, Dmax\_ind, CWTmax\_raw, CWTmax\_ind; measured, indexed and residual mean radial diameter and mean cell wall thickness, Dmean\_raw, Dmean\_ind, Dmean\_res, CWTmean\_raw, CWTmean\_ind, CWTmean\_res.

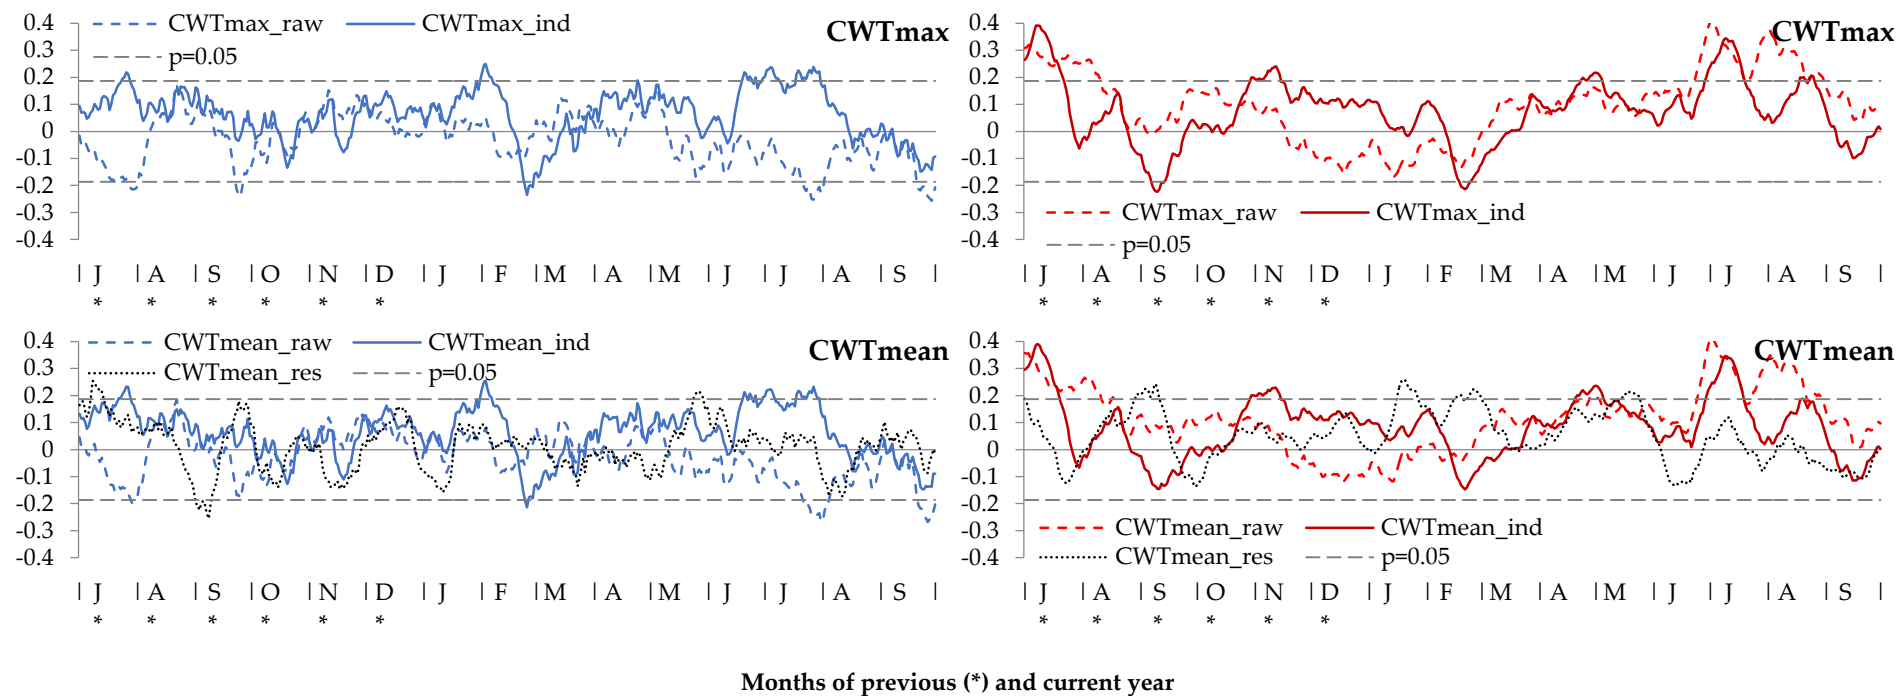

Figure S5. Continued.

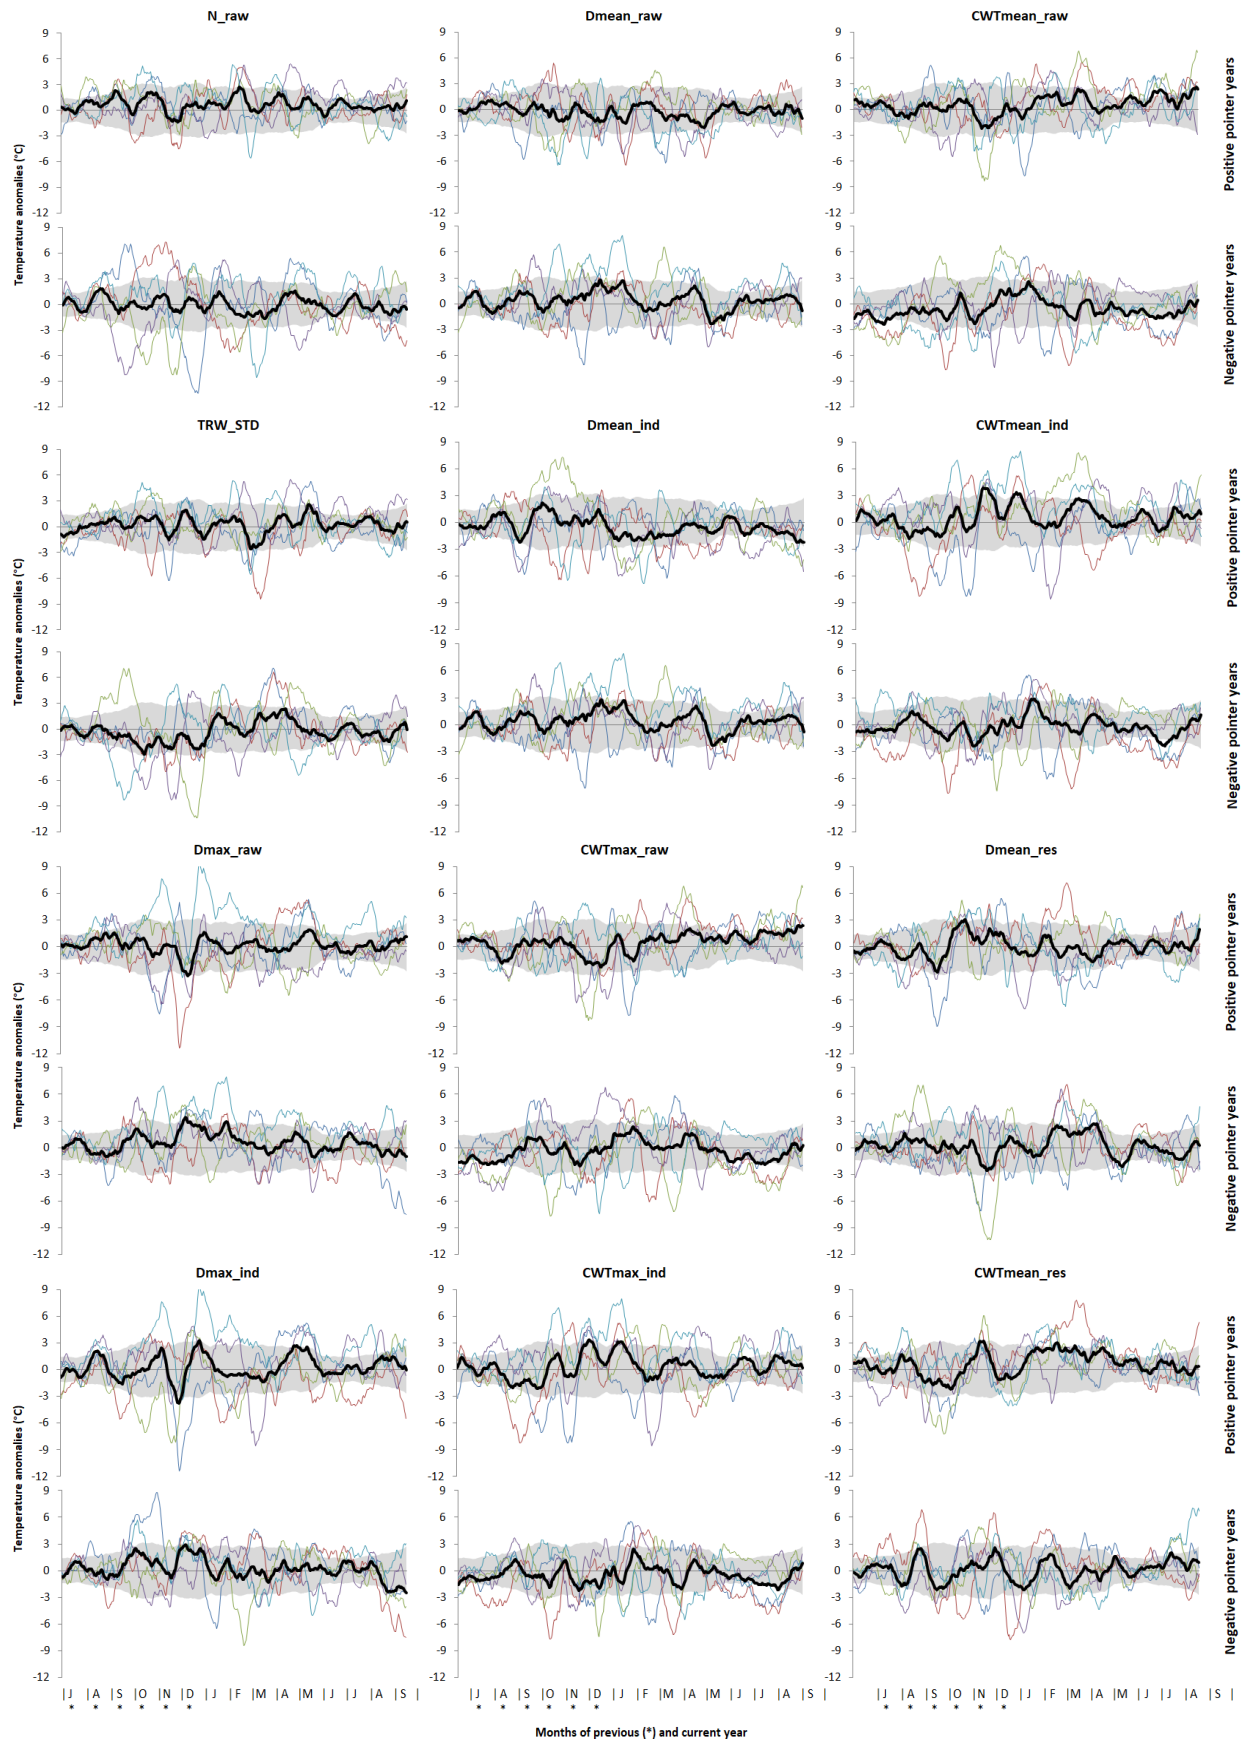

**Figure S6.** Temperature anomalies smoothed by 21-day moving average for positive and negative pointer years in chronologies of tree-ring parameters. Thin lines are individual years, bold lines represent their average, and shade represents standard deviation for each DOY.

**Table S1.** Correlation coefficients between tree-ring chronologies and temperature-related characteristics of vegetative season defined through threshold value  $T_{thr}$  in regional temperature series. Bold black correlation values are significant at  $p < 0.05$ .

| Threshold temperature, $T_{thr}$ (°C *)                | N raw        | TRW std      | Dmax raw     | Dmean raw | CWTmax raw   | CWTmean raw  | Dmax ind      | Dmean ind    | CWTmax ind   | CWTmean ind  | Dmean res    | CWTmean res  |
|--------------------------------------------------------|--------------|--------------|--------------|-----------|--------------|--------------|---------------|--------------|--------------|--------------|--------------|--------------|
| Duration of $T > T_{thr}$ for current year, Dur        |              |              |              |           |              |              |               |              |              |              |              |              |
| 7                                                      | -0.019       | -0.042       | 0.024        | -0.094    | 0.017        | 0.043        | 0.069         | -0.071       | 0.048        | 0.076        | -0.169       | 0.114        |
| 7.5                                                    | -0.096       | -0.109       | 0.012        | -0.123    | -0.006       | 0.053        | 0.103         | -0.059       | 0.100        | 0.146        | -0.185       | <b>0.196</b> |
| 8                                                      | -0.092       | -0.095       | -0.011       | -0.149    | 0.118        | 0.185        | 0.089         | -0.086       | <b>0.190</b> | <b>0.230</b> | -0.211       | <b>0.201</b> |
| 8.5                                                    | 0.041        | 0.009        | 0.019        | -0.133    | 0.181        | <b>0.245</b> | 0.036         | -0.150       | 0.140        | 0.183        | -0.254       | <b>0.196</b> |
| 9                                                      | 0.064        | 0.048        | 0.035        | -0.118    | <b>0.249</b> | <b>0.303</b> | 0.044         | -0.144       | 0.173        | <b>0.208</b> | -0.252       | 0.177        |
| 9.5                                                    | 0.084        | 0.071        | 0.014        | -0.103    | <b>0.253</b> | <b>0.273</b> | 0.006         | -0.142       | 0.146        | 0.154        | -0.213       | 0.069        |
| 10                                                     | 0.055        | 0.099        | 0.085        | -0.035    | <b>0.213</b> | <b>0.221</b> | 0.082         | -0.060       | 0.116        | 0.118        | -0.167       | 0.039        |
| 10.5                                                   | 0.012        | 0.094        | 0.093        | 0.028     | <b>0.187</b> | 0.183        | 0.100         | 0.025        | 0.138        | 0.129        | -0.059       | 0.006        |
| 11                                                     | 0.025        | 0.051        | 0.111        | 0.052     | <b>0.214</b> | <b>0.215</b> | 0.101         | 0.038        | 0.143        | 0.135        | -0.042       | 0.012        |
| 11.5                                                   | 0.140        | 0.155        | 0.136        | 0.127     | <b>0.263</b> | <b>0.236</b> | 0.080         | 0.081        | 0.123        | 0.093        | 0.041        | -0.072       |
| Beginning date of $T > T_{thr}$ for current year, Dbeg |              |              |              |           |              |              |               |              |              |              |              |              |
| 7                                                      | 0.112        | <b>0.192</b> | -0.120       | 0.084     | -0.010       | -0.048       | <b>-0.197</b> | 0.042        | -0.077       | -0.105       | <b>0.250</b> | -0.124       |
| 7.5                                                    | 0.123        | 0.179        | -0.067       | 0.132     | 0.075        | 0.024        | -0.159        | 0.078        | -0.060       | -0.102       | <b>0.267</b> | -0.170       |
| 8                                                      | 0.063        | 0.146        | -0.061       | 0.133     | -0.064       | -0.106       | -0.150        | 0.090        | -0.137       | -0.166       | <b>0.276</b> | -0.145       |
| 8.5                                                    | -0.067       | 0.026        | -0.043       | 0.157     | -0.076       | -0.141       | -0.049        | <b>0.197</b> | -0.053       | -0.106       | <b>0.335</b> | -0.206       |
| 9                                                      | -0.053       | 0.001        | -0.017       | 0.125     | -0.087       | -0.142       | -0.039        | 0.138        | -0.079       | -0.126       | <b>0.239</b> | -0.194       |
| 9.5                                                    | -0.024       | 0.032        | 0.089        | 0.176     | -0.128       | -0.136       | 0.067         | <b>0.194</b> | -0.131       | -0.138       | <b>0.220</b> | -0.063       |
| 10                                                     | 0.001        | -0.028       | 0.015        | 0.162     | -0.174       | -0.164       | -0.041        | 0.154        | -0.220       | -0.212       | <b>0.264</b> | -0.036       |
| 10.5                                                   | -0.017       | -0.090       | -0.094       | -0.004    | -0.159       | -0.155       | -0.124        | -0.014       | -0.186       | -0.181       | 0.098        | -0.035       |
| 11                                                     | 0.006        | -0.054       | -0.079       | -0.063    | -0.156       | -0.187       | -0.091        | -0.075       | -0.181       | -0.200       | -0.022       | -0.122       |
| 11.5                                                   | -0.076       | -0.133       | -0.157       | -0.186    | -0.186       | -0.201       | -0.150        | -0.198       | -0.133       | -0.139       | -0.146       | -0.062       |
| Ending date of $T > T_{thr}$ for current year, Dend    |              |              |              |           |              |              |               |              |              |              |              |              |
| 7                                                      | 0.094        | 0.148        | -0.096       | -0.043    | 0.012        | 0.010        | -0.114        | -0.056       | -0.015       | -0.006       | 0.028        | 0.029        |
| 7.5                                                    | -0.011       | 0.032        | -0.056       | -0.041    | 0.074        | 0.108        | -0.019        | -0.003       | 0.086        | 0.109        | 0.014        | 0.110        |
| 8                                                      | -0.075       | 0.004        | -0.079       | -0.090    | 0.112        | 0.170        | -0.018        | -0.037       | 0.147        | 0.177        | -0.037       | 0.154        |
| 8.5                                                    | -0.003       | 0.037        | -0.012       | -0.047    | <b>0.193</b> | <b>0.226</b> | 0.007         | -0.035       | 0.155        | 0.168        | -0.058       | 0.093        |
| 9                                                      | 0.042        | 0.066        | 0.034        | -0.057    | <b>0.268</b> | <b>0.295</b> | 0.027         | -0.081       | 0.170        | 0.178        | -0.145       | 0.079        |
| 9.5                                                    | 0.090        | 0.121        | 0.097        | 0.018     | <b>0.221</b> | <b>0.240</b> | 0.066         | -0.017       | 0.078        | 0.082        | -0.089       | 0.036        |
| 10                                                     | 0.082        | 0.118        | 0.140        | 0.110     | 0.141        | 0.162        | 0.080         | 0.064        | -0.047       | -0.038       | 0.017        | 0.022        |
| 10.5                                                   | 0.000        | 0.051        | 0.044        | 0.040     | 0.121        | 0.118        | 0.023         | 0.024        | 0.015        | 0.006        | 0.014        | -0.028       |
| 11                                                     | 0.044        | 0.020        | 0.083        | 0.012     | 0.156        | 0.127        | 0.056         | -0.022       | 0.025        | -0.007       | -0.086       | -0.109       |
| 11.5                                                   | 0.128        | 0.096        | 0.047        | 0.006     | <b>0.200</b> | 0.147        | -0.027        | -0.072       | 0.049        | 0.001        | -0.079       | -0.161       |
| Sum of $T > T_{thr}$ for current year, GDD             |              |              |              |           |              |              |               |              |              |              |              |              |
| 7                                                      | 0.152        | <b>0.247</b> | -0.007       | -0.016    | <b>0.274</b> | <b>0.284</b> | -0.032        | -0.048       | <b>0.199</b> | <b>0.209</b> | -0.040       | 0.094        |
| 7.5                                                    | 0.106        | 0.186        | 0.006        | -0.017    | <b>0.316</b> | <b>0.338</b> | 0.003         | -0.028       | <b>0.246</b> | <b>0.258</b> | -0.045       | 0.116        |
| 8                                                      | 0.066        | 0.166        | 0.005        | -0.040    | <b>0.335</b> | <b>0.369</b> | 0.022         | -0.038       | <b>0.278</b> | <b>0.294</b> | -0.077       | 0.137        |
| 8.5                                                    | 0.101        | 0.174        | 0.028        | -0.031    | <b>0.364</b> | <b>0.380</b> | 0.020         | -0.054       | <b>0.268</b> | <b>0.272</b> | -0.097       | 0.092        |
| 9                                                      | -0.115       | 0.186        | 0.043        | -0.037    | <b>0.409</b> | <b>0.424</b> | 0.029         | -0.071       | <b>0.292</b> | <b>0.293</b> | -0.131       | 0.091        |
| 9.5                                                    | 0.136        | <b>0.219</b> | 0.073        | 0.003     | <b>0.375</b> | <b>0.389</b> | 0.047         | -0.036       | <b>0.242</b> | <b>0.243</b> | -0.098       | 0.073        |
| 10                                                     | 0.137        | <b>0.220</b> | 0.098        | 0.062     | <b>0.317</b> | <b>0.332</b> | 0.051         | 0.015        | 0.155        | 0.159        | -0.027       | 0.062        |
| 10.5                                                   | 0.083        | 0.184        | 0.032        | 0.033     | <b>0.314</b> | <b>0.315</b> | 0.008         | 0.008        | <b>0.204</b> | <b>0.198</b> | 0.004        | 0.039        |
| 11                                                     | 0.115        | 0.143        | 0.030        | 0.004     | <b>0.359</b> | <b>0.341</b> | 0.000         | -0.035       | <b>0.223</b> | <b>0.199</b> | -0.052       | -0.021       |
| 11.5                                                   | 0.161        | <b>0.192</b> | 0.028        | 0.046     | <b>0.369</b> | <b>0.331</b> | -0.028        | -0.007       | <b>0.227</b> | <b>0.189</b> | 0.016        | -0.070       |
| Duration of $T > T_{thr}$ for previous year, Dur*      |              |              |              |           |              |              |               |              |              |              |              |              |
| 7                                                      | 0.098        | 0.073        | -0.031       | -0.025    | 0.019        | -0.038       | -0.079        | -0.069       | -0.059       | -0.088       | -0.025       | -0.123       |
| 7.5                                                    | 0.080        | 0.092        | -0.022       | -0.091    | -0.048       | -0.054       | -0.043        | -0.122       | -0.066       | -0.062       | -0.137       | -0.004       |
| 8                                                      | 0.117        | 0.146        | 0.047        | -0.048    | 0.153        | 0.120        | 0.049         | -0.061       | 0.085        | 0.058        | -0.136       | -0.075       |
| 8.5                                                    | <b>0.187</b> | <b>0.214</b> | 0.021        | -0.060    | <b>0.265</b> | <b>0.259</b> | -0.033        | -0.131       | 0.107        | 0.097        | -0.160       | -0.008       |
| 9                                                      | <b>0.206</b> | <b>0.212</b> | 0.002        | -0.074    | <b>0.206</b> | 0.180        | -0.049        | -0.145       | 0.065        | 0.046        | -0.166       | -0.052       |
| 9.5                                                    | <b>0.197</b> | <b>0.223</b> | 0.140        | 0.009     | <b>0.216</b> | <b>0.205</b> | 0.095         | -0.051       | 0.058        | 0.047        | -0.165       | -0.023       |
| 10                                                     | <b>0.190</b> | <b>0.269</b> | 0.131        | 0.044     | 0.175        | 0.153        | 0.058         | -0.030       | 0.024        | 0.011        | -0.099       | -0.039       |
| 10.5                                                   | 0.095        | <b>0.229</b> | 0.136        | 0.078     | 0.155        | 0.139        | 0.070         | 0.020        | 0.053        | 0.042        | -0.038       | -0.026       |
| 11                                                     | <b>0.203</b> | <b>0.237</b> | 0.136        | 0.063     | <b>0.256</b> | <b>0.261</b> | 0.044         | -0.027       | 0.101        | 0.106        | -0.081       | 0.045        |
| 11.5                                                   | <b>0.225</b> | <b>0.221</b> | 0.184        | 0.085     | <b>0.207</b> | <b>0.200</b> | 0.090         | -0.006       | 0.053        | 0.057        | -0.095       | 0.028        |
| Ending date of $T > T_{thr}$ for previous year, Dend*  |              |              |              |           |              |              |               |              |              |              |              |              |
| 7                                                      | -0.035       | -0.064       | -0.072       | -0.032    | 0.062        | 0.034        | -0.041        | -0.001       | 0.082        | 0.063        | 0.038        | -0.047       |
| 7.5                                                    | 0.039        | 0.051        | -0.030       | -0.051    | 0.008        | 0.040        | -0.001        | -0.027       | 0.033        | 0.060        | -0.038       | 0.106        |
| 8                                                      | 0.034        | 0.050        | -0.026       | -0.090    | 0.156        | 0.153        | 0.036         | -0.048       | 0.173        | 0.161        | -0.105       | 0.007        |
| 8.5                                                    | 0.127        | 0.162        | 0.014        | -0.040    | <b>0.238</b> | <b>0.252</b> | -0.021        | -0.088       | 0.137        | 0.139        | -0.108       | 0.044        |
| 9                                                      | <b>0.213</b> | <b>0.229</b> | 0.033        | -0.051    | <b>0.211</b> | <b>0.204</b> | -0.030        | -0.135       | 0.070        | 0.062        | -0.168       | -0.009       |
| 9.5                                                    | <b>0.223</b> | <b>0.262</b> | 0.164        | 0.066     | <b>0.220</b> | <b>0.226</b> | 0.096         | -0.010       | 0.033        | 0.030        | -0.107       | -0.002       |
| 10                                                     | <b>0.232</b> | <b>0.264</b> | 0.131        | 0.068     | <b>0.205</b> | <b>0.194</b> | 0.021         | -0.043       | -0.043       | -0.055       | -0.082       | -0.054       |
| 10.5                                                   | 0.136        | <b>0.203</b> | 0.159        | 0.099     | 0.124        | 0.111        | 0.091         | 0.037        | -0.034       | -0.046       | -0.033       | -0.054       |
| 11                                                     | <b>0.282</b> | <b>0.269</b> | <b>0.214</b> | 0.156     | 0.090        | 0.114        | 0.077         | 0.036        | -0.136       | -0.108       | -0.020       | 0.062        |
| 11.5                                                   | <b>0.256</b> | <b>0.229</b> | <b>0.239</b> | 0.167     | 0.024        | 0.062        | 0.144         | 0.082        | -0.129       | -0.080       | -0.017       | 0.137        |
| Sum of $T > T_{thr}$ for previous year, GDD*           |              |              |              |           |              |              |               |              |              |              |              |              |
| 7                                                      | 0.045        | 0.076        | -0.004       | -0.049    | <b>0.234</b> | <b>0.192</b> | 0.010         | -0.052       | <b>0.212</b> | 0.183        | -0.086       | -0.045       |
| 7.5                                                    | 0.098        | 0.145        | 0.025        | -0.050    | <b>0.214</b> | <b>0.210</b> | 0.035         | -0.060       | 0.182        | 0.181        | -0.120       | 0.049        |
| 8                                                      | 0.098        | 0.138        | 0.012        | -0.093    | <b>0.292</b> | <b>0.272</b> | 0.039         | -0.095       | <b>0.255</b> | <b>0.236</b> | -0.176       | 0.003        |
| 8.5                                                    | 0.138        | 0.180        | 0.031        | -0.069    | <b>0.318</b> | <b>0.307</b> | 0.010         | -0.113       | <b>0.226</b> | <b>0.214</b> | -0.175       | 0.020        |
| 9                                                      | 0.173        | <b>0.206</b> | 0.020        | -0.090    | <b>0.317</b> | <b>0.291</b> | -0.009        | -0.150       | <b>0.216</b> | <b>0.195</b> | -0.210       | -0.014       |
| 9.5                                                    | 0.166        | <b>0.218</b> | 0.101        | -0.027    | <b>0.336</b> | <b>0.317</b> | 0.077         | -0.076       | <b>0.220</b> | <b>0.198</b> | -0.184       | -0.016       |
| 10                                                     | 0.167        | <b>0.210</b> | 0.064        | -0.035    | <b>0.331</b> | <b>0.293</b> | 0.013         | -0.107       | 0.179        | 0.146        | -0.168       | -0.069       |
| 10.5                                                   | 0.092        | 0.157        | 0.065        | -0.030    | <b>0.273</b> | <b>0.240</b> | 0.042         | -0.071       | <b>0.188</b> | 0.159        | -0.144       | -0.049       |
| 11                                                     | <b>0.187</b> | 0.170        | 0.091        | 0.007     | <b>0.259</b> | <b>0.229</b> | 0.012         | -0.078       | 0.115        | 0.097        | -0.125       | -0.031       |
| 11.5                                                   | 0.171        | 0.146        | 0.100        | 0.016     | 0.173        | 0.157        | 0.047         | -0.045       | 0.087        | 0.089        | -0.111       | 0.032        |

\* Threshold temperature values are presented according to regional series averaged for geographic grid; temperatures at the sampling site are assumed to have the same pattern of inter- and intra-annual variation, but they are lower than values presented in table.
